# Supplementary material
Source: Springer Nature journal article supplement (https://www.springermedizin.de/resource/supplementary/12943_2011_949_MOESM11_ESM.pdf/9551742)

# A

un-Mac-origin      IL-4-Mac origin

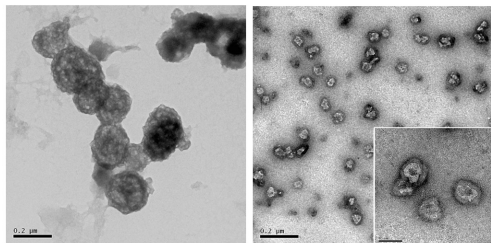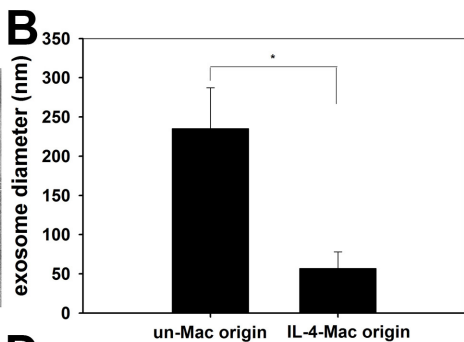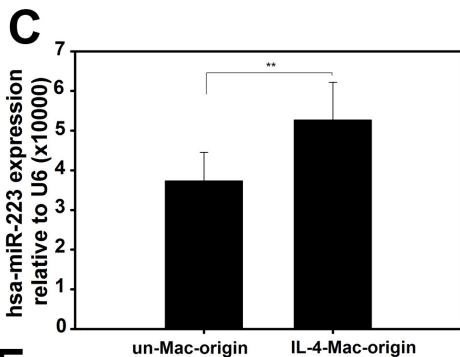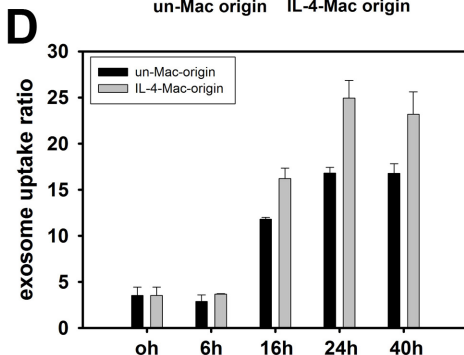

# E

labeled exosome      DAPI

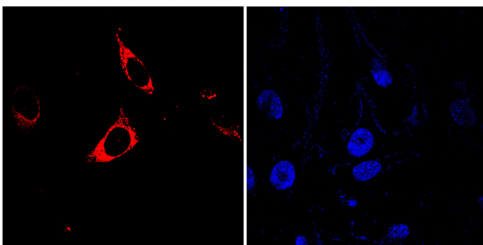

bright field      merge

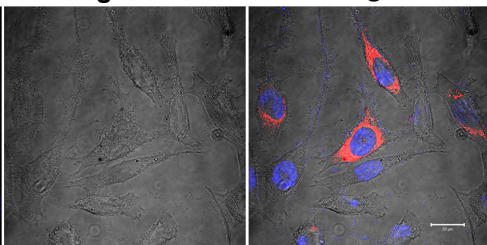

Supplement: MOESM11 [file 9551742]
